# Supplementary material
Source: publisher figshare collection journal article supplement (https://sage.figshare.com/ndownloader/files/22090089)
Supplement: Supplementary file 1 [file 22090089]

| **Table 4. Anatomic Distribution of Lymphoproliferations in NSG Mice following PDX Transplantation** | | | | | | | | | | | | | | | | |
| --- | --- | --- | --- | --- | --- | --- | --- | --- | --- | --- | --- | --- | --- | --- | --- | --- |
| **Case** | **Lung** | **Eso**a | **Ton** | **Thg** | **Salv** | **Stom** | **SI** | **LI** | **CNS** | **BM** | **Liver** | **Kid** | **Spl** | **LNC** | **Skin** | **MC** |
| **1** | + | + | + | + | + | + | - | - | + | + | + | + | - | +b | + | + |
| **2** | + | + | - | + | + | + | - | - | - | + | + | + | + | +b | + | + |
| **3** | + | - | - | - | - | - | - | - | - | - | + | - | + | + | - | - |
| **4**c | +d | +d | +d | +d | +d | +d | - | - | - | - | +d | +d | +d | +d | +d | +d |
| **5**e | +d | +d | +d | +d | +d | +d | - | - | + | - | +d,f | + | +d,f | + | +d | +d |
| **6**e | +d | +d | +d | +d | +d | +d | - | - | + | - | +d,f | - | +d,f | - | +d | +d |
| **7**e | +d | +d | +d | +d | +d | +d | - | - | + | +d | +d,f | - | +/minf | n/t | +d | +d |
| **8**c | - | - | - | - | - | - | - | - | +d | - | +d,f | - | +d,f | - | - | - |
| **9** | + | + | + | + | + | + | + | - | + | - | + | + | + | +b | + | + |
| **10** | +/min | - | - | - | - | - | - | - | - | - | +/min | - | - | n/t | + | - |
| **11** | + | - | - | + | + | - | + | - | + | - | + | + | + | +b | + | + |
| **Total** | **11** | **8** | **6** | **8** | **8** | **7** | **2** | **0** | **7** | **3** | **11** | **6** | **9** | **7** | **9** | **8** |
| Abbreviation n/t: no tissue available a: Eso: Esophagus, Ton: tongue, Thg: thyroid gland, Salv: salivary gland, | | | | | | | | | | | | | | | |  |
| Stom: stomach, SI: small intestines, LI: large intestines, CNS: central nervous system, BM: bone marrow, | | | | | | | | | | | | | | | |  |
| Kid: kidney, Spl spleen, LNC: cervical lymph node, MC: mucocutaneous junctions; min: minimal infiltration of tissue by immune cells; b: sclerosis observed; c: monomorphic PTLD; d: PTLD present; e: polymorphic PTLD  f: EBV-positive by ISH  PTLD: post-transplantation lymphoproliferative disorder, PDX: patient derived xenograft, EBER: EBV-encoded small RNAs, ISH: *in situ* hybridization | | | | | | | | | | | | | | | | |
|  | | | |  |  |  |  |  |  |  |  |  |  |  |  |  |
